# Supplementary material for: Safety and tolerability of Bifidobacterium longum subspecies infantis EVC001 supplementation in healthy term breastfed infants: a phase I clinical trial
Source: Springer Nature journal article supplement (doi:10.1186/s12887-017-0886-9), 2017-05-30
Supplement: MOESM1 [file 12326432]

## Infant Stool Form Scale

### Consistency

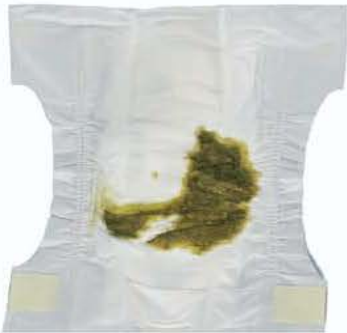

A: watery

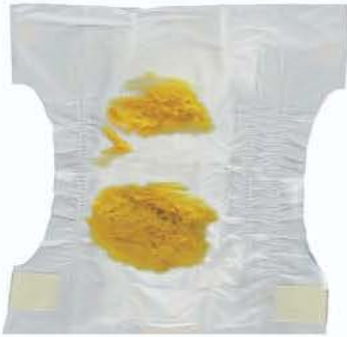

B: soft

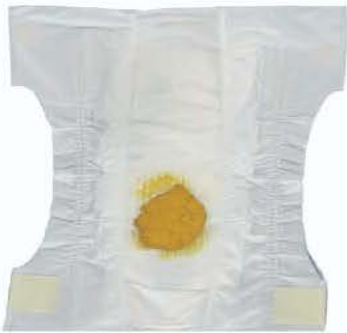

C: formed

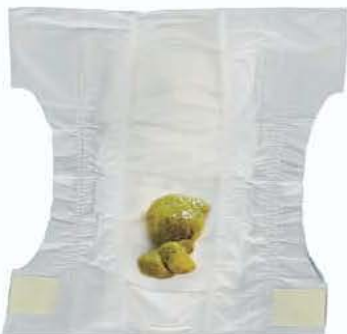

D: hard

Please use this Infant Stool Scale to rate your baby's FIRST stool of the day on your Daily Infant Gut Symptomology Log.

Please use the designated "A", "B", "C", or "D" scores found below each image to rate the consistency of your baby's stool.

Please use your best judgment when rating the stool consistency.

If your baby's stool falls between two categories, select the rating that best describes the stool.

For example, if your baby's stool is partly formed (C) but mostly still soft (B), please write "B" on your Daily Infant Gut Symptomology Log.
